# Supplementary material for: Histidine: A Systematic Review on Metabolism and Physiological Effects in Human and Different Animal Species
Source: Nutrients. 2020 May 14;12(5):1414. doi: 10.3390/nu12051414 (PMC7284872; doi:10.3390/nu12051414)
Supplement: Supplementary file 1 [file nutrients-12-01414-s001.zip]

Archive with 4 entries (4 files):
- Methodology_supplementary material.docx
- Table S1. The PRISMA statement.doc
- manuscript.v13.docx
- manuscript.v13.pdf
